# Supplementary material
Source: PubMed Central journal article supplement (PMC7484248)
Supplement: NIHMS1609117-supplement-216_2020_2792_MOESM1_ESM.pdf [file NIHMS1609117-supplement-216_2020_2792_MOESM1_ESM.pdf]

## **Analytical and Bioanalytical Chemistry**

### **Electronic Supplementary Material**

#### **Quantification of fractional and absolute functionalization of gelatin hydrogels by optimized ninhydrin assay and $^1\text{H}$ NMR**

Jonathan M. Zatorski, Alyssa N. Montalbino, Jennifer E. Ortiz-Cárdenas,  
Rebecca R. Pompano

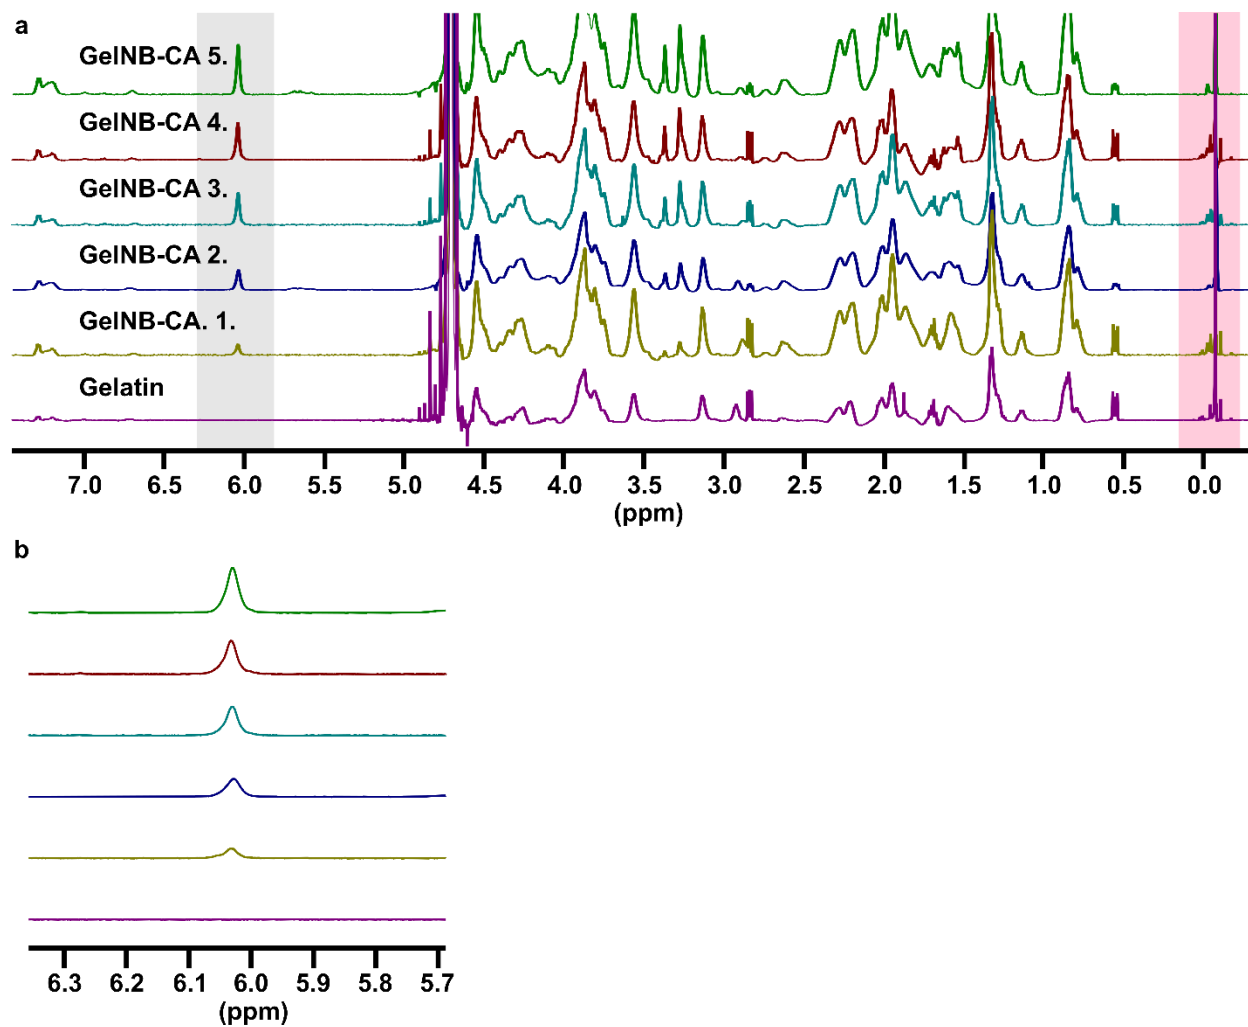

**Fig. S1** GelNB NMR spectra. (a) Full NMR spectra of non-functionalized gelatin and GelNB. Integration ranges for the functional group peak and internal standard are shown in gray and pink respectively. Note: GelNB-CA 5 is also shown in Fig. 3. The spectrum is redisplayed here to allow for comparison to other GelNB-CA samples. (b) Expanded functional group range

**Table S1** DoF values for each sample, including those nominally reported, determined by <sup>1</sup>H-NMR, and determined by the optimized ninhydrin assay

| <b>Sample</b> | <b>Nominal fractional DoF<sup>a</sup></b> | <b><sup>1</sup>H NMR absolute DoF (mmol -R per g gelatin)</b> | <b><sup>1</sup>H NMR fractional DoF (%)</b> | <b>Ninhydrin fractional DoF (%)</b> | <b>Ninhydrin StDev (%)</b> |
|---------------|-------------------------------------------|---------------------------------------------------------------|---------------------------------------------|-------------------------------------|----------------------------|
| GelNB - CA 1  | N/A                                       | 0.067                                                         | 22                                          | 3                                   | 8.7                        |
| GelNB - CA 2  | N/A                                       | 0.157                                                         | 52                                          | 56                                  | 3.0                        |
| GelNB - CA 3  | N/A                                       | 0.191                                                         | 64                                          | 61                                  | 2.3                        |
| GelNB - CA 4  | N/A                                       | 0.195                                                         | 65                                          | 65                                  | 0.5                        |
| GelNB - CA 5  | N/A                                       | 0.227                                                         | 76                                          | 40                                  | 2.1                        |
| GelNB - NHS   | N/A                                       | 0.216                                                         | 72                                          | 78                                  | 0.05                       |
| GelMA*        | N/A                                       | 0.195                                                         | 65                                          | 50                                  | 2.3                        |
| GelMA S32     | 32%                                       | 0.088                                                         | 23                                          | 59                                  | 3.9                        |
| GelMA S63     | 63%                                       | 0.191                                                         | 50                                          | 74                                  | 0.5                        |
| GelMA S70     | 70%                                       | 0.232                                                         | 61                                          | 76                                  | 0.5                        |

<sup>a</sup> Nominal values were reported by Sigma based on NMR analysis. The method for analyzing the spectra was proprietary.

\* This GelMA sample was prepared in-house.
